# Supplementary material for: Exceptionally large fracture strength and stretchability of 2D ReS2 and ReSe2
Source: Royal Society of Chemistry journal article supplement (doi:10.1039/d3nr03670g), 2023-12-14
Supplement: d3nr03670g1.pdf [file d3nr03670g1.pdf]

## Supporting Information

### *Exceptionally Large Fracture Strength and Stretchability of 2D ReS<sub>2</sub> and ReSe<sub>2</sub>*

*Guy Alboteanu and Assaf Ya'akovovitz*

#### Force-deflection measurements

We acquired more than 100 force-deflection measurements for each of the investigated materials. In addition to the measurements shown in Fig. 3d in the main text, we show some representative measurements in Fig. S1. We presented the distribution of all captured Young's moduli in Fig. S2. Notably, the averaged values of Young's moduli are given in Fig. 4a and b in the main text. The relationship between Young's moduli and pretension values of ReS<sub>2</sub> and ReSe<sub>2</sub> is shown in Fig. S3.

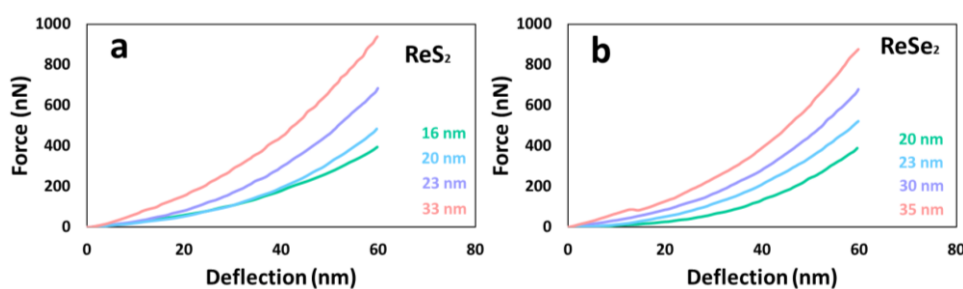

Fig. S1. Representative force-deflection measurements of (a) ReS<sub>2</sub> and (b) ReSe<sub>2</sub>.

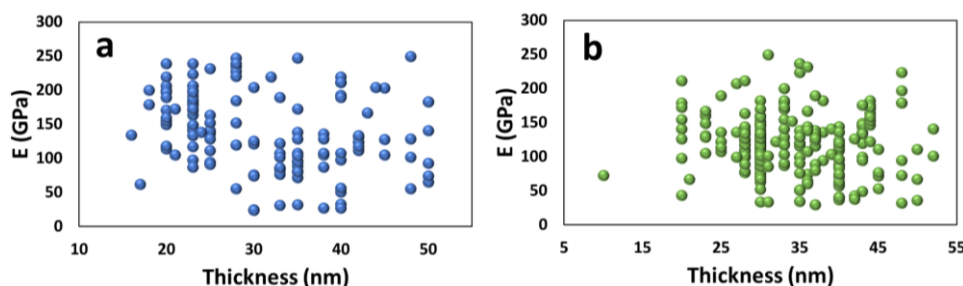

Fig. S2. Measured Young's moduli of (a) ReS<sub>2</sub> and (b) ReSe<sub>2</sub>.

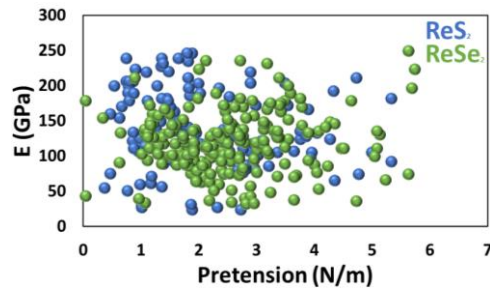

Fig. S3. The relationship between Young's modulus and pretension.

### Studies included in Figure 6

The studies included in Fig. 6 in the main text are listed in Table S1.

Table S1. Studies included in Fig. 6 in the main text.

|                                     | Material                        | Thickness (nm) | Reference                                                                                                                 |
|-------------------------------------|---------------------------------|----------------|---------------------------------------------------------------------------------------------------------------------------|
| <b>Topological insulator</b>        | Bi <sub>2</sub> Te <sub>3</sub> | 5              | L. Guo, H. Yan, Q. Moore, M. Buettner, J. Song, L. Li, P. T. Araujo and H. Wang, <i>Nanoscale</i> , 2015, 7, 11915–11921. |
| <b>Group III Mono-chalcogenides</b> | GaS<br>GaSe<br>GaTe             | 10             | B. Chitara and A. Ya'akovovitz, <i>Nanoscale</i> , 2018, 10, 13022–13027.                                                 |
| <b>TMDs</b>                         | WSe <sub>2</sub>                | 3.35           | R. Zhang, V. Koutsos, R. Cheung, R. Zhang, V. Koutsos and R. Cheung, <i>Appl. Phys. Lett.</i> , 2016, 108, 042104.        |
|                                     | MoS <sub>2</sub>                | 0.67           | S. Bertolazzi, J. Brivio and A. Kis, <i>ACS Nano</i> , 2011, 12, 9703–9709.                                               |
|                                     |                                 | 1.34           |                                                                                                                           |
|                                     | HS <sub>2</sub>                 | 12             | Y. M. Jahn and A. Ya'akovovitz, <i>Nanoscale</i> , 2021, 13, 18458–18466.                                                 |
|                                     |                                 | 14             |                                                                                                                           |
| 15                                  |                                 |                |                                                                                                                           |
| <b>Graphene</b>                     | Gr                              | 0.335          | C. Lee, X. Wei, J. W. Kysar and J. Hone, <i>Science</i> , 2008, 321, 385–389.                                             |
| <b>Black phosphorus</b>             | BP                              | 14.3-34        | J.-Y. Wang, Y. Li, Z.-Y. Zhan, T. Li, L. Zhen and C.-Y. Xu, <i>Appl. Phys. Lett.</i> , 2016, 108, 013104.                 |

### Fracture measurements

We present additional representative fracture measurements in Fig. S4. All measured fracture strengths and maximal strains and their distributions are shown in Fig. S5 and Fig. S6, respectively.

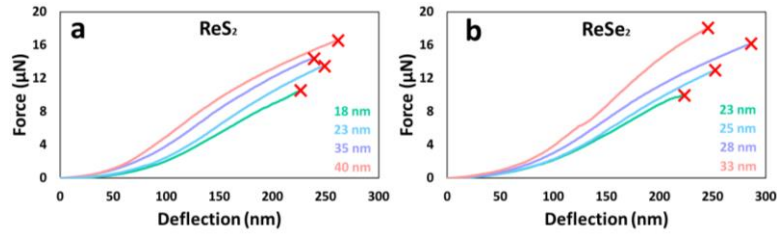

Fig. S4. Representative force-deflection measurements reaching fracture of (a) ReS<sub>2</sub> and (b) ReSe<sub>2</sub>.

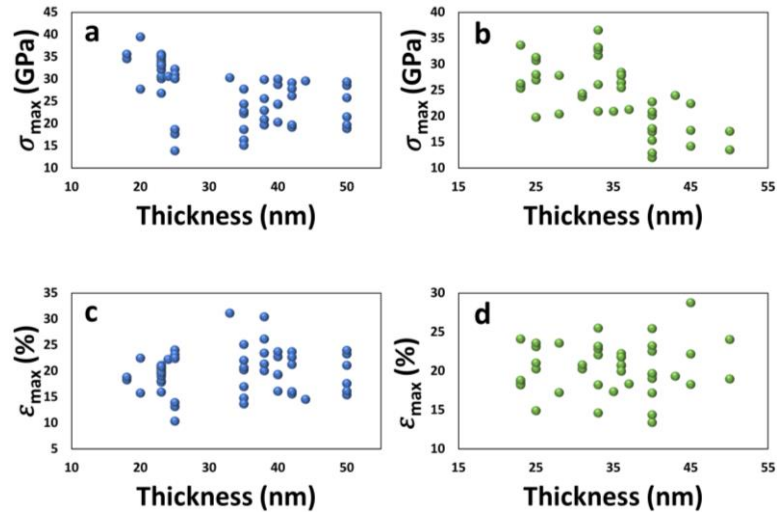

Fig. S5. Measured fracture strengths of (a) ReS<sub>2</sub> and (b) ReSe<sub>2</sub> nano-drumheads. Maximal strain measurements of (c) ReS<sub>2</sub> and (d) ReSe<sub>2</sub> nano-drumheads.

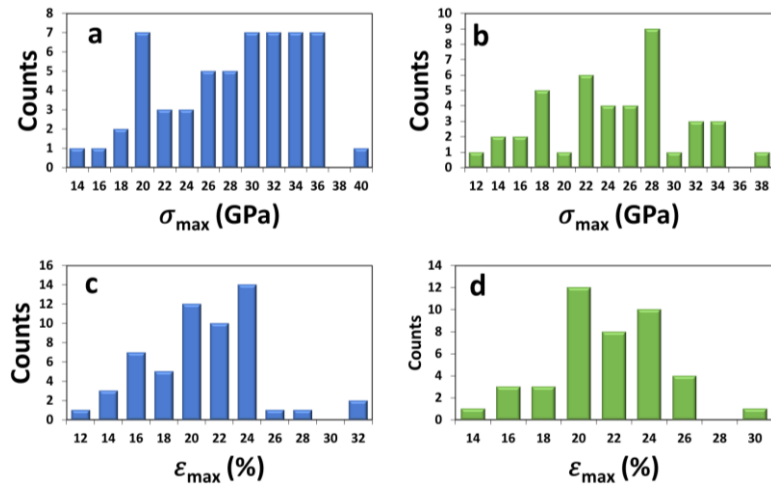

Fig. S6. Fracture strengths distribution of (a) ReS<sub>2</sub> and (b) ReSe<sub>2</sub>. Maximal strain distributions of (c) ReS<sub>2</sub> and (d) ReSe<sub>2</sub>.
